# Supplementary material
Source: publisher site journal article supplement (https://www.dovepress.com/article/352365)
Supplement: Supplementary file 1 [file get_supplementary_file.php]

**Appendix**

**Mplus Code**

7.2.1 Confirmatory factor analysis code

TITLE:xinxi

DATA:FILE IS Mplusdata.dat;

VARIABLE:

NAMES ARE id A1-A9;

usevar = A1-A7;

MODEL:

F1 BY A1 A2 A3;

F2 BY A3 A4 A5;

F3 BY A3 A6 A7;

OUTPUT:standardized mod

SAVEdata:save = fscores;

file is k12.dat;

7.2.2 Composite reliability

INPUT INSTRUCTIONS

DATA: FILE IS Mplus.dat;! The file path of the input statement needs to be adjusted according to the actual situation

VARIABLE: NAMES ARE x1-x9;

USEVARIABLES ARE x1-x9;

MODEL:

x1-x9(ve1-ve9);! Calculate the variance

x1 with x2-x4(cov1-cov3);! Calculate covariance

x2 with x3-x4(cov4-cov5);

x3 with x4(cov6);

x5 with x6-x9(cov7-cov10);

x6 with x7-x9(cov11-cov13);

x7 with x8-x9(cov14-cov15);

x8 with x9(cov16);

MODEL CONSTRAINT:! Model limited

NEW (F1ve F2ve F1cov F2cov alpha1 alpha2);! Newly generated variables

F1ve=ve1+ve2+ve3+ve4;! Calculate the sum of variance

F1cov=cov1+cov2+cov3+cov4+cov5+cov6;! We compute the sum of the covariances

F2ve=ve5+ve6+ve7+ve8+ve9;

F2cov=cov7+cov8+cov9+cov10+cov11+cov12+cov13+cov14+cov15+cov16;

Alpha1=4/3*(1-(F1ve/(F1ve+2*F1cov)));! Calculate α coefficient

Alpha2=5/4*(1-(F2ve/(F2ve+2*F2cov)));

OUTPUT:! Output result

CINTERVAL;

STANDARDIZED;
